# Supplementary material for: Estrogen receptor α in T cells suppresses follicular helper T cell responses and prevents autoimmunity
Source: PubMed Central journal article supplement (PMC6465332; doi:10.1038/s12276-019-0237-z), 2019-04-15
Supplement: 12276_2019_237_MOESM2_ESM.pdf [file 12276_2019_237_MOESM2_ESM.pdf]

| Primer pair    |         | Sequence (5' - 3')      |
|----------------|---------|-------------------------|
| Bcl-6          | Forward | CCGGCACGCTAGTGATGTT     |
|                | Reverse | TGTCTTATGGGCTCTAAACTGCT |
| IL-21          | Forward | CGCCTCCTGATTAGACTTCG    |
|                | Reverse | TGGGTGTCCTTTTCTCATAACG  |
| ER $\alpha$    | Forward | TCCAGCAGTAACGAGAAAGGA   |
|                | Reverse | AGCCAGAGGCATAGTCATTGC   |
| ER $\beta$     | Forward | CTGTGCCTCTTCTCSCSSGGA   |
|                | Reverse | TGCTCCAAGGGTAGGATGGAC   |
| $\beta$ -Actin | Forward | TGTCCCTGTATGCCTCTGGT    |
|                | Reverse | CACGCACGATTTCCCTCTC     |
