# Supplementary material for: Estrogen receptor α in T cells suppresses follicular helper T cell responses and prevents autoimmunity
Source: PubMed Central journal article supplement (PMC6465332; doi:10.1038/s12276-019-0237-z), 2019-04-15

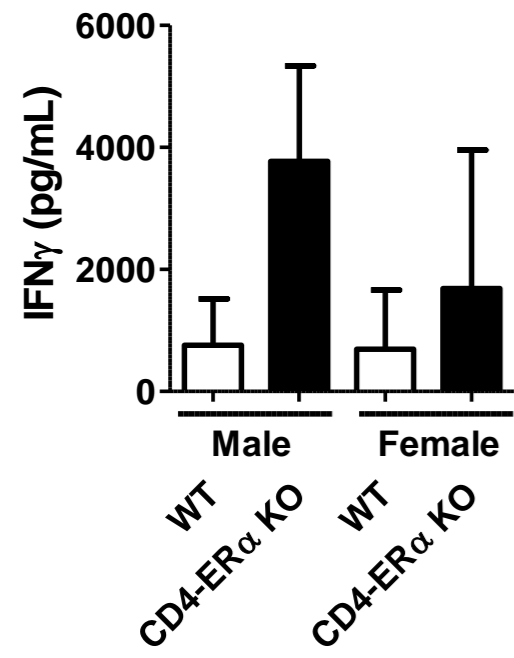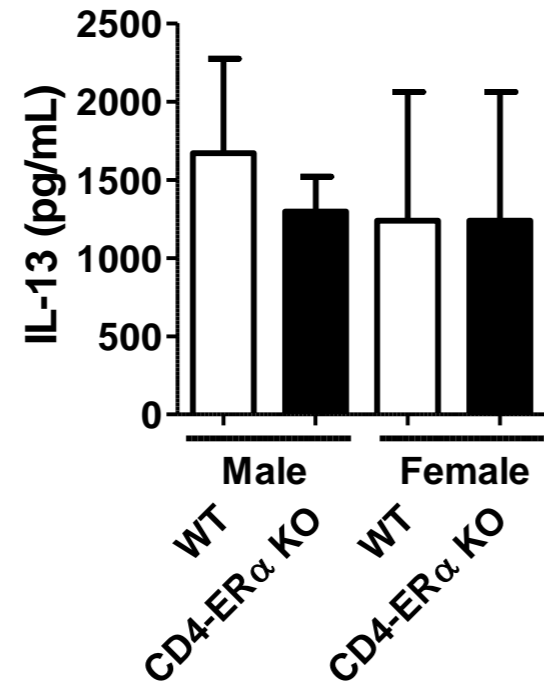

Supplement: 12276_2019_237_MOESM10_ESM.pdf [file 12276_2019_237_MOESM10_ESM.pdf]
